# Supplementary material for: Efficient glycolysis of PET catalyzed by a metal-free phosphazene base: the important role of EG−
Source: Royal Society of Chemistry journal article supplement (doi:10.1039/d1gc03885k), 2022-01-01
Supplement: d1gc03885k1.pdf [file d1gc03885k1.pdf]

## Supporting Information

### **Efficient glycolysis of PET catalyzed by a metal-free phosphazene base: the important role of EG<sup>-</sup>**

Chumeng Fan,<sup>a</sup> Lei Zhang,<sup>b</sup> Chenxi Zhu,<sup>a</sup> Jingjing Cao,<sup>a</sup> Yunlong Xu,<sup>a</sup> Ping Sun,<sup>a</sup> Guixiang Zeng,<sup>\*c</sup> Wei  
Jiang<sup>\*a</sup> and Quanxing Zhang<sup>a</sup>

<sup>a</sup>State Key Laboratory of Pollution Control and Resources Reuse, School of the Environment, Nanjing University, Nanjing 210023, China

\*Corresponding Author, E-mail: [jiangwei@nju.edu.cn](mailto:jiangwei@nju.edu.cn); Tel: +86-25-8968-0399

<sup>b</sup>Institute of Theoretical and Computational Chemistry, School of Chemistry and Chemical Engineering, Nanjing University, Nanjing 210023, China

<sup>c</sup>Kuang Yaming Honors School & Institute for Brain Sciences, Nanjing University, Nanjing 210023, China

### Complete Representation of Reference 36

Gaussian 16, Revision A.03, M. J. Frisch, G. W. Trucks, H. B. Schlegel, G. E. Scuseria, M. A. Robb, J. R. Cheeseman, G. Scalmani, V. Barone, G. A. Petersson, H. Nakatsuji, X. Li, M. Caricato, A. V. Marenich, J. Bloino, B. G. Janesko, R. Gomperts, B. Mennucci, H. P. Hratchian, J. V. Ortiz, A. F. Izmaylov, J. L. Sonnenberg, D. Williams-Young, F. Ding, F. Lipparini, F. Egidi, J. Goings, B. Peng, A. Petrone, T. Henderson, D. Ranasinghe, V. G. Zakrzewski, J. Gao, N. Rega, G. Zheng, W. Liang, M. Hada, M. Ehara, K. Toyota, R. Fukuda, J. Hasegawa, M. Ishida, T. Nakajima, Y. Honda, O. Kitao, H. Nakai, T. Vreven, K. Throssell, J. A. Montgomery, Jr., J. E. Peralta, F. Ogliaro, M. J. Bearpark, J. J. Heyd, E. N. Brothers, K. N. Kudin, V. N. Staroverov, T. A. Keith, R. Kobayashi, J. Normand, K. Raghavachari, A. P. Rendell, J. C. Burant, S. S. Iyengar, J. Tomasi, M. Cossi, J. M. Millam, M. Klene, C. Adamo, R. Cammi, J. W. Ochterski, R. L. Martin, K. Morokuma, O. Farkas, J. B. Foresman, and D. J. Fox, Gaussian, Inc., Wallingford CT, 2016.

**Table S1.** Reaction energies of EG<sup>-</sup> generation through the proton abstraction of organic bases.

| Organic Base + EG → Organic Base H <sup>+</sup> + EG <sup>-</sup> |                                |
|-------------------------------------------------------------------|--------------------------------|
| Organic Base                                                      | $\Delta G_{298.15}$ (kcal/mol) |
| Py                                                                | 25.4                           |
| DMAP                                                              | 17.5                           |
| DBU                                                               | 8.4                            |
| TBD                                                               | 6.4                            |
| <i>t</i> -BuP <sub>1</sub>                                        | 2.4                            |
| <i>t</i> -BuP <sub>2</sub>                                        | -4.1                           |

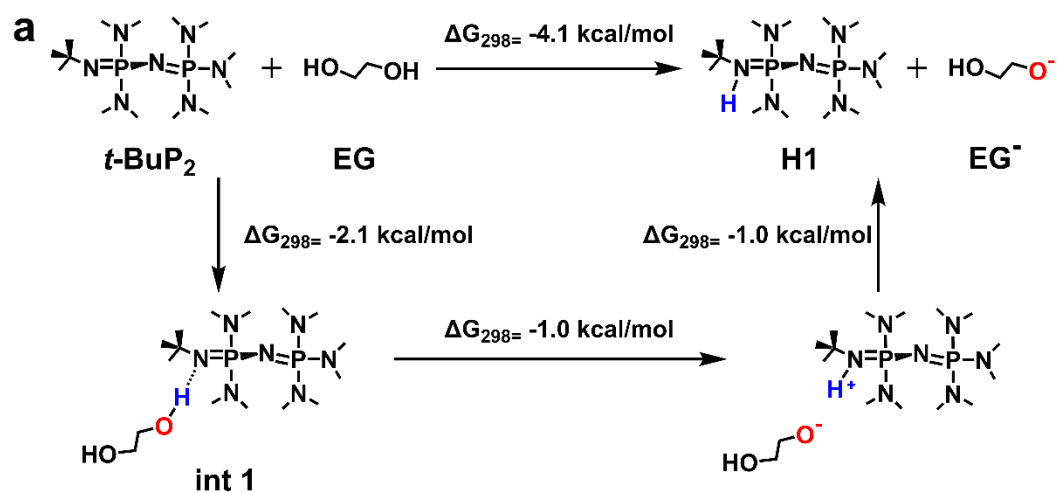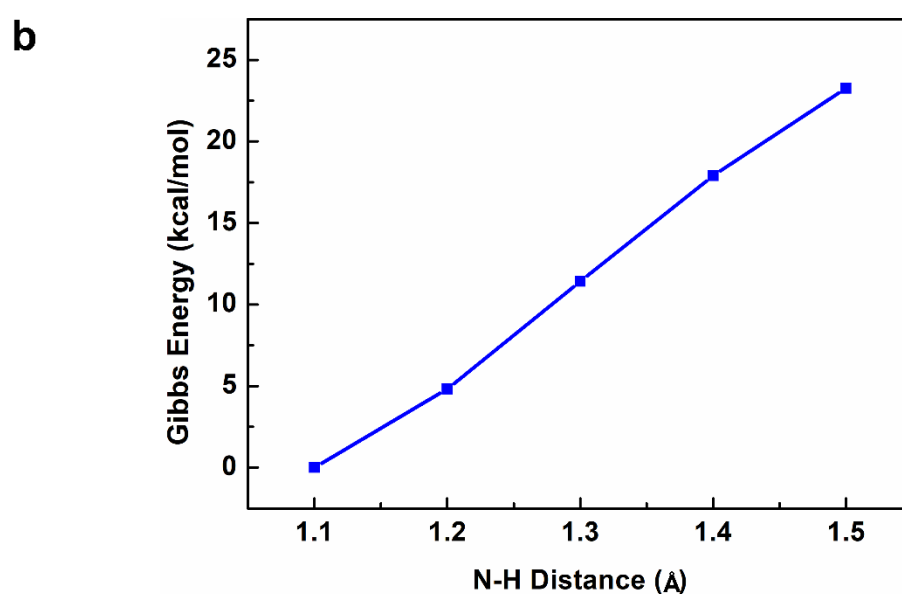

**Fig S1.** (a) The total and sub-step reaction formulas and Gibbs reaction energies of the proton migration from EG to *t*-BuP<sub>2</sub>; (b) The relative Gibbs energies of the **int 1** for the proton migration from EG to *t*-BuP<sub>2</sub> through fixed optimizations (with respect to the N-H distance 1.1).

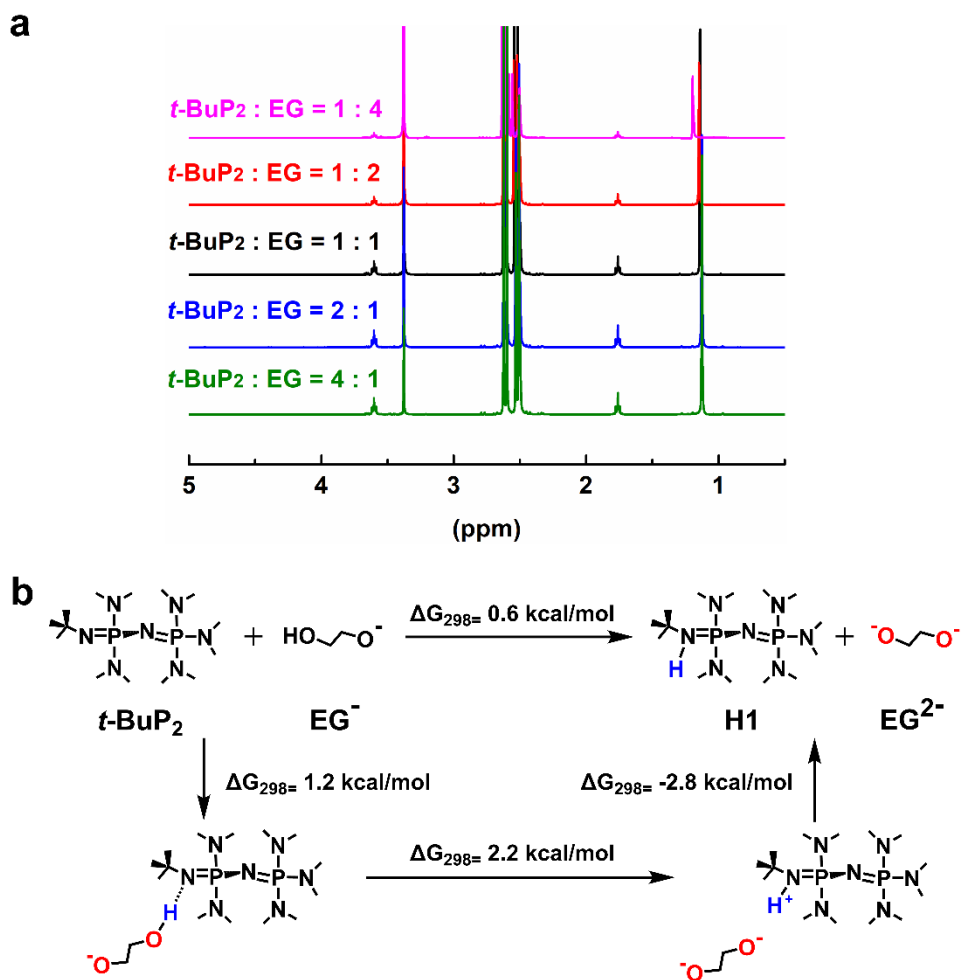

**Fig S2.** a)  $^1\text{H}$  NMR spectrum of  $t\text{-BuP}_2$  and EG mixed in different molar ratios. b) The total and sub-step reaction formulas and reaction energies of abstracting the second proton from ethylene glycol.

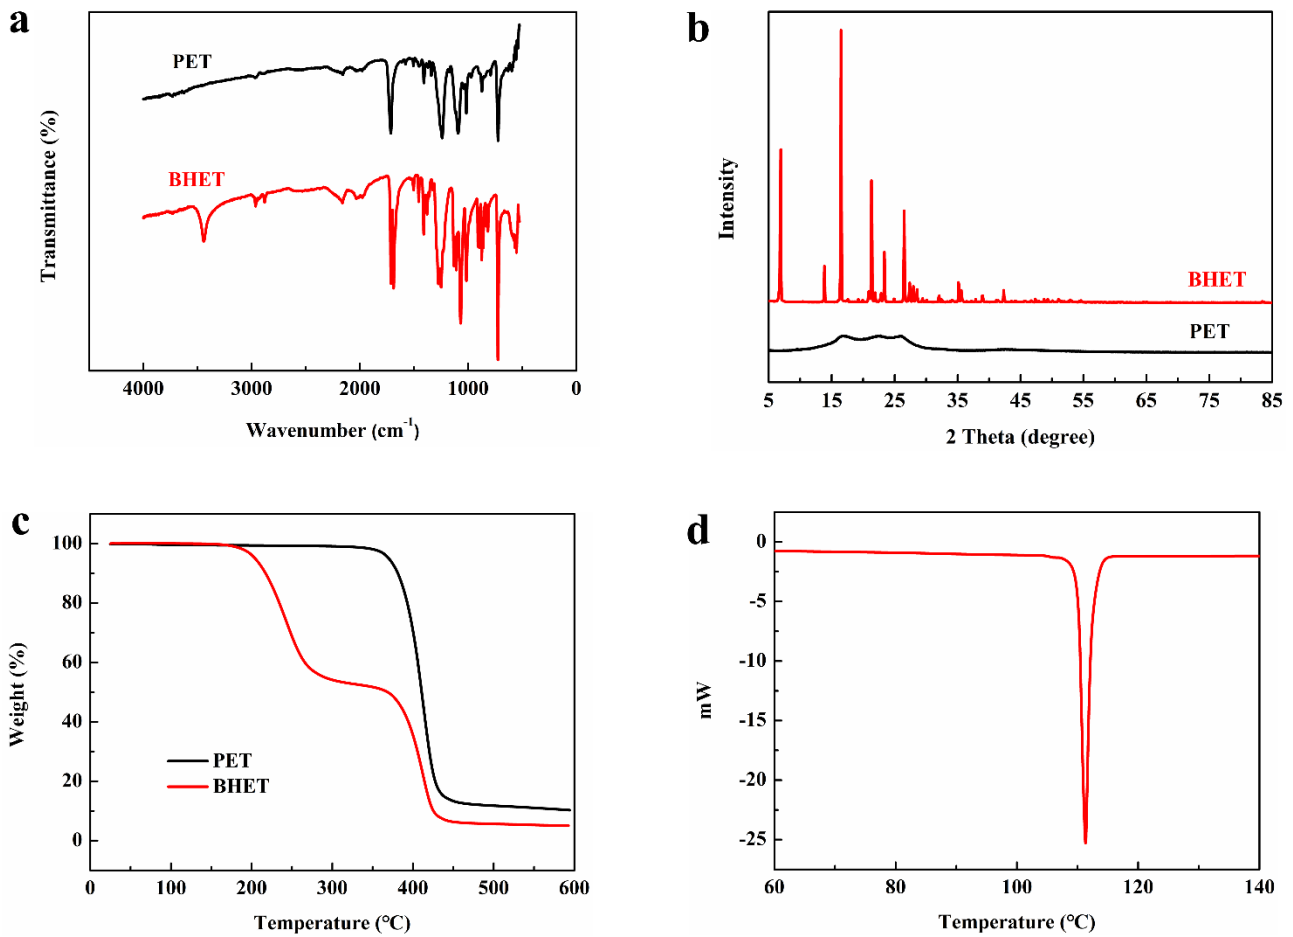

**Fig S3.** (a) FT-IR spectra of PET particles and main product; (b) XRD spectra of PET particles and main product; (c) TGA curves of PET particles and main product; (d) DSC curve of main product.

**Table S2.** Linear regression results for the data in Figure 5(a).

| Temp.(K) | Rate constant | $R^2$   |
|----------|---------------|---------|
| 443      | 0.00828       | 0.99016 |
| 453      | 0.01493       | 0.99067 |
| 463      | 0.03291       | 0.99036 |
| 473      | 0.06591       | 0.98792 |

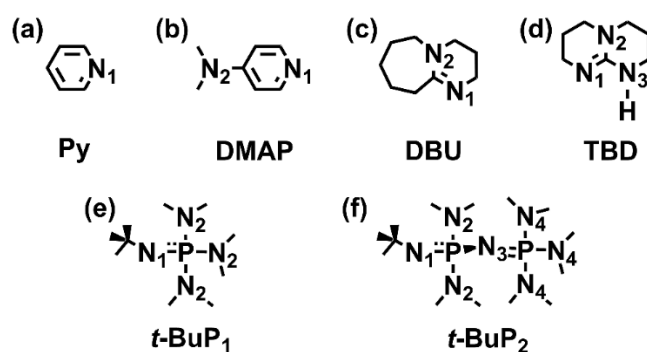

**Fig S4.** Structural formulas of organic bases with different nitrogen sites.

**Table S3.** Reaction energies of EG with different organic bases (kcal/mol).

| Organic Base + EG $\rightarrow$ Organic Base H <sup>+</sup> + EG <sup>-</sup> |                     |
|-------------------------------------------------------------------------------|---------------------|
| Organic Base                                                                  | $\Delta G_{298.15}$ |
| Py <sup>1</sup>                                                               | 25.4                |
| DMAP <sup>1</sup>                                                             | 17.5                |
| DMAP <sup>2</sup>                                                             | 31.8                |
| DBU <sup>1</sup>                                                              | 8.4                 |
| DBU <sup>2</sup>                                                              | 35.3                |
| TBD <sup>1</sup>                                                              | 6.4                 |
| TBD <sup>2</sup>                                                              | 36.1                |
| TBD <sup>3</sup>                                                              | 32.3                |
| <i>t</i> -BuP <sub>1</sub> <sup>1</sup>                                       | 2.4                 |
| <i>t</i> -BuP <sub>1</sub> <sup>2</sup>                                       | 24.2                |

1: N1 of the organic base abstract hydrogen of hydroxyl in EG.

2: N2 of the organic base abstract hydrogen of hydroxyl in EG.

3: N3 of the organic base abstract hydrogen of hydroxyl in EG.

Figure S3 showed that the organic bases had different nitrogen sites, and the reaction energies of these nitrogen sites in organic bases abstracting the hydrogen of hydroxyl in EG were listed in Table 1. As shown in Table 1, the reaction energies of N1 in organic bases abstracting H from EG were 25.4, 17.5, 8.4 and 6.4 kcal/mol, respectively, which was much lower than the N2 and N3, indicating that the N2 and N3 in organic bases hardly possessed the ability for abstracting proton in EG.

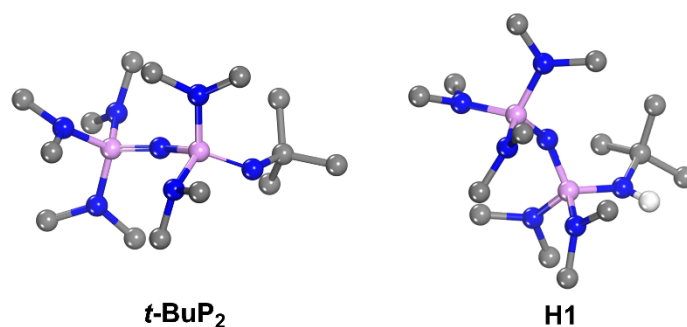

**Fig S5.** Optimized geometries of  $t\text{-BuP}_2$  and H1.

**Table S4.** Reaction energies of four different nitrogen sites in  $t\text{-BuP}_2$  to abstract hydrogen from EG and the relative energies E of the four products after abstracting H from EG (with respect to the H1) (kcal/mol).

| $t\text{-BuP}_2 + \text{EG} \rightarrow \text{H } t\text{-BuP}_2^+ + \text{EG}^-$ |                     |      |
|-----------------------------------------------------------------------------------|---------------------|------|
| Organic Base <sup>a</sup>                                                         | $\Delta G_{298.15}$ | E    |
| H1                                                                                | -4.1                | 0    |
| H2                                                                                | 16.7                | 20.8 |
| H3                                                                                | 23.9                | 28.0 |
| H4                                                                                | 31.4                | 35.4 |

a: H1 is the product after N1 in  $t\text{-BuP}_2$  abstracting hydrogen from EG. H2 is the product after N2 in  $t\text{-BuP}_2$  abstracting hydrogen from EG. H3 is the product after N3 in  $t\text{-BuP}_2$  abstracting hydrogen from EG. H4 is the product after N4 in  $t\text{-BuP}_2$  abstracting hydrogen from EG.

The optimized geometries of  $t\text{-BuP}_2$  and H1 (the product after N1 in  $t\text{-BuP}_2$  abstracting hydrogen from EG) were showed in Figure S4, and Table S4 showed the reaction energies of four different nitrogen sites in  $t\text{-BuP}_2$  to abstract hydrogen from EG. As shown in Table S4, the reaction energies of N1, N2 and N3 in organic bases abstracting H from EG were 16.7, 23.9 and 31.4 kcal/mol, respectively, suggesting that they were thermodynamically unfavorable.

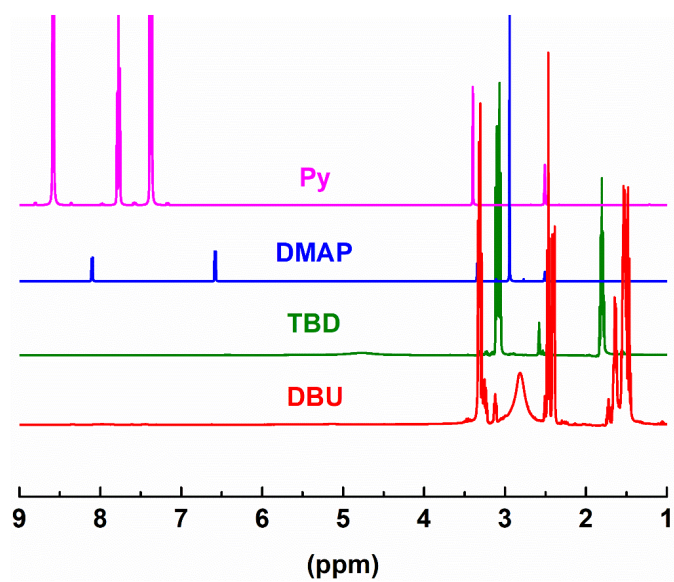

**Fig S6.** <sup>1</sup>H NMR spectrum of organic bases.



**t-BuP<sub>2</sub>**

|   |             |             |             |
|---|-------------|-------------|-------------|
| P | -1.64626700 | -0.19797600 | -0.04632000 |
| N | -2.23802800 | -0.52185200 | 1.47509400  |
| N | -2.07822100 | -1.44299300 | -1.06420100 |
| N | -0.10461800 | -0.07410000 | -0.02968200 |
| N | -2.41804500 | 1.18148100  | -0.57857500 |
| P | 1.36524300  | 0.53726500  | 0.10791800  |
| N | 1.70106000  | 1.25734500  | -1.38662800 |
| N | 1.24102200  | 1.84735100  | 1.19671800  |
| N | 2.51951500  | -0.41554100 | 0.58940400  |
| C | 0.74587200  | 2.17618500  | -1.97809700 |
| H | 0.89039500  | 3.21163600  | -1.62642200 |
| H | 0.86157800  | 2.17321200  | -3.06988100 |
| H | -0.27755000 | 1.86984800  | -1.74942300 |
| C | 3.06102600  | 1.47809800  | -1.84446000 |
| H | 3.15965800  | 1.17991700  | -2.89756800 |
| H | 3.35095800  | 2.53883500  | -1.77224500 |
| H | 3.76214200  | 0.88822800  | -1.25127800 |
| C | 2.41842800  | 2.69680900  | 1.31574500  |
| H | 2.14395900  | 3.61962000  | 1.84093100  |
| H | 3.23628500  | 2.21542000  | 1.87773900  |
| H | 2.79518000  | 2.97723500  | 0.32917600  |
| C | 0.66841500  | 1.54359800  | 2.50127700  |
| H | 1.35599200  | 0.96641400  | 3.14268300  |
| H | 0.43264100  | 2.48257100  | 3.01685000  |
| H | -0.26084600 | 0.97938100  | 2.39084000  |
| C | -3.23927400 | -2.28901300 | -0.84323700 |
| H | -3.02020700 | -3.29477800 | -1.22093600 |
| H | -3.45835800 | -2.37643600 | 0.22223900  |
| H | -4.13825800 | -1.92039400 | -1.35957100 |
| C | -1.59269600 | -1.43477100 | -2.43662400 |

|   |             |             |             |
|---|-------------|-------------|-------------|
| H | -1.29391400 | -2.44850000 | -2.73027000 |
| H | -2.36553800 | -1.08615100 | -3.13788900 |
| H | -0.72193500 | -0.78070600 | -2.53002000 |
| C | -3.63370900 | 1.18965000  | -1.37460700 |
| H | -4.51895100 | 1.43224400  | -0.76773600 |
| H | -3.54680500 | 1.94776400  | -2.16333400 |
| H | -3.79936100 | 0.22391800  | -1.85331000 |
| C | -2.16924200 | 2.42831100  | 0.13036000  |
| H | -2.92206300 | 2.60645600  | 0.91355700  |
| H | -1.17669600 | 2.41906600  | 0.58921200  |
| H | -2.20563500 | 3.26452300  | -0.57870800 |
| C | -1.55058900 | -1.45859500 | 2.34956900  |
| H | -1.67675200 | -1.13832000 | 3.39101400  |
| H | -1.95113100 | -2.47898100 | 2.25167600  |
| H | -0.48224000 | -1.47528000 | 2.12552000  |
| C | -3.61425300 | -0.25327600 | 1.86291400  |
| H | -3.63144600 | 0.28401500  | 2.81963100  |
| H | -4.12182800 | 0.36006500  | 1.11666300  |
| H | -4.18652500 | -1.18410700 | 1.98466900  |
| C | 2.77555400  | -1.78381600 | 0.13475600  |
| C | 1.88231100  | -2.78219300 | 0.89367300  |
| C | 2.55655400  | -2.00123200 | -1.37497300 |
| C | 4.24244700  | -2.10146300 | 0.45597700  |
| H | 1.99794700  | -2.65298000 | 1.97713200  |
| H | 0.82737800  | -2.62550600 | 0.64187700  |
| H | 2.14014600  | -3.82015600 | 0.64427000  |
| H | 3.18584700  | -1.32860900 | -1.96895400 |
| H | 2.80815800  | -3.03200100 | -1.65613900 |
| H | 1.51037100  | -1.82740400 | -1.65484000 |
| H | 4.50330500  | -3.13016800 | 0.17607100  |
| H | 4.91091200  | -1.41991700 | -0.08509400 |

|    |             |             |             |
|----|-------------|-------------|-------------|
| H  | 4.43470800  | -1.98090900 | 1.52936100  |
| EG |             |             |             |
| C  | -0.57533700 | 0.49309500  | 0.00017000  |
| H  | -0.51795200 | 1.13149100  | -0.89075300 |
| H  | -0.51790100 | 1.13117800  | 0.89137600  |
| C  | 0.57533700  | -0.49309500 | -0.00019500 |
| H  | 0.51793000  | -1.13119300 | -0.89139100 |
| H  | 0.51792400  | -1.13147500 | 0.89073900  |
| O  | 1.78082800  | 0.26318100  | -0.00021600 |
| H  | 2.52671600  | -0.34644800 | 0.00168000  |
| O  | -1.78082800 | -0.26318100 | 0.00021200  |
| H  | -2.52671600 | 0.34644900  | -0.00147300 |
| H1 |             |             |             |
| P  | -1.63958100 | -0.31235800 | 0.13976000  |
| N  | -2.30425000 | 0.00674300  | 1.62260700  |
| N  | -2.10968600 | -1.81896300 | -0.36831000 |
| N  | -0.06315600 | -0.34801300 | 0.26727700  |
| N  | -2.26497300 | 0.83531000  | -0.87004500 |
| P  | 1.18787300  | 0.53426000  | -0.12452100 |
| N  | 0.87338300  | 1.53233900  | -1.41391100 |
| N  | 1.67431800  | 1.43635200  | 1.17075700  |
| N  | 2.49158400  | -0.37247800 | -0.57477400 |
| C  | 0.48627200  | 0.95606800  | -2.69385500 |
| H  | -0.27242200 | 1.59071700  | -3.16673000 |
| H  | 1.34600800  | 0.87585100  | -3.37643800 |
| H  | 0.05812700  | -0.04059300 | -2.56046700 |
| C  | 1.44738200  | 2.86631000  | -1.50566400 |
| H  | 2.47545800  | 2.85755700  | -1.89761800 |
| H  | 0.82774700  | 3.46441300  | -2.18300700 |

|   |             |             |             |
|---|-------------|-------------|-------------|
| H | 1.44040800  | 3.35922000  | -0.53126900 |
| C | 3.01536100  | 1.99327200  | 1.28284800  |
| H | 3.00723800  | 3.08068500  | 1.12586200  |
| H | 3.41045900  | 1.79517600  | 2.28685300  |
| H | 3.68446300  | 1.53839200  | 0.55099100  |
| C | 0.71278100  | 2.05025600  | 2.07373300  |
| H | 1.08904500  | 1.98045000  | 3.10147200  |
| H | 0.55800900  | 3.11215000  | 1.83425000  |
| H | -0.24805300 | 1.53551600  | 2.02935700  |
| C | -3.46860900 | -2.29400600 | -0.14395200 |
| H | -3.44355900 | -3.38033000 | -0.00374800 |
| H | -3.89242600 | -1.85094900 | 0.75927200  |
| H | -4.13198900 | -2.07031200 | -0.99171300 |
| C | -1.41137400 | -2.51444900 | -1.44167400 |
| H | -1.29431300 | -3.57148000 | -1.17492500 |
| H | -1.96823800 | -2.45941100 | -2.38799300 |
| H | -0.41968900 | -2.08662000 | -1.59249900 |
| C | -3.07246600 | 0.54876000  | -2.04280700 |
| H | -4.12389300 | 0.82136600  | -1.87368300 |
| H | -2.69900000 | 1.12850000  | -2.89604700 |
| H | -3.02587500 | -0.50623100 | -2.31237500 |
| C | -2.12471100 | 2.25388100  | -0.57873500 |
| H | -3.11017500 | 2.70880600  | -0.40559500 |
| H | -1.51218100 | 2.41751100  | 0.31024400  |
| H | -1.64484700 | 2.76640100  | -1.42143400 |
| C | -1.76000800 | -0.61819700 | 2.81974600  |
| H | -1.81651500 | 0.08848100  | 3.65620800  |
| H | -2.32452000 | -1.52233200 | 3.08968700  |
| H | -0.71250000 | -0.88787000 | 2.66859800  |
| C | -3.64459000 | 0.55015600  | 1.79548400  |
| H | -3.60533000 | 1.44473100  | 2.42973600  |

|   |             |             |             |
|---|-------------|-------------|-------------|
| H | -4.08418800 | 0.82305600  | 0.83403600  |
| H | -4.30360200 | -0.18461600 | 2.27752500  |
| C | 3.02071000  | -1.61385600 | 0.03602100  |
| C | 2.97605000  | -1.52898000 | 1.56321000  |
| C | 2.21717200  | -2.83002600 | -0.44110600 |
| C | 4.47492400  | -1.73486800 | -0.42701500 |
| H | 3.56032400  | -0.68065000 | 1.93397800  |
| H | 1.94984500  | -1.43750300 | 1.93501600  |
| H | 3.40199400  | -2.44631500 | 1.98383100  |
| H | 2.19098000  | -2.86973300 | -1.53682400 |
| H | 2.67355100  | -3.75756200 | -0.07616500 |
| H | 1.18851900  | -2.78424800 | -0.07057300 |
| H | 4.93031900  | -2.64453100 | -0.02116900 |
| H | 4.53354300  | -1.78773500 | -1.52159300 |
| H | 5.06263000  | -0.87294800 | -0.09136900 |
| H | 2.72636400  | -0.28049200 | -1.55488000 |

1 EG<sup>-</sup>

|   |             |             |             |
|---|-------------|-------------|-------------|
| C | 0.67629600  | 0.47502700  | -0.00009100 |
| H | 0.55404400  | 1.13897900  | 0.88414000  |
| H | 0.55429800  | 1.13863900  | -0.88464800 |
| C | -0.50821000 | -0.48946200 | 0.00003400  |
| H | -0.45712500 | -1.13130800 | 0.89095300  |
| H | -0.45726000 | -1.13131700 | -0.89085800 |
| O | -1.73064400 | 0.25641700  | 0.00019200  |
| H | -2.46992800 | -0.36092500 | -0.00115500 |
| O | 1.88907600  | -0.20234900 | 0.00004700  |

2 [BHET]<sub>3</sub>

|   |             |            |             |
|---|-------------|------------|-------------|
| C | -0.98339000 | 0.99302700 | -0.03162500 |
| C | 0.35799700  | 1.34780500 | -0.03145900 |

|   |             |             |             |
|---|-------------|-------------|-------------|
| C | 1.34307000  | 0.35778700  | -0.03139200 |
| C | 0.98338600  | -0.99285600 | -0.03152600 |
| C | -0.35800300 | -1.34763400 | -0.03096300 |
| C | -1.34307300 | -0.35761800 | -0.03099100 |
| H | -1.74466600 | 1.76504800  | -0.03151800 |
| H | 0.64286600  | 2.39456700  | -0.03132700 |
| H | 1.74466200  | -1.76487700 | -0.03133600 |
| H | -0.64286800 | -2.39439600 | -0.03044700 |
| C | 2.76936400  | 0.78397600  | -0.02961400 |
| O | 3.13601700  | 1.94766100  | -0.01965000 |
| O | 3.61844700  | -0.24157500 | -0.03954900 |
| C | 5.01690800  | 0.07433100  | -0.03472300 |
| H | 5.26094300  | 0.64150000  | 0.86756400  |
| H | 5.26193200  | 0.66688700  | -0.92022200 |
| C | 5.72735900  | -1.26314700 | -0.05354500 |
| H | 5.48587800  | -1.82840800 | -0.95765900 |
| H | 5.47898900  | -1.85733900 | 0.82997400  |
| O | 7.12600700  | -0.94833600 | -0.04254400 |
| C | -2.76936500 | -0.78381600 | -0.02876700 |
| O | -3.13599300 | -1.94750800 | -0.01846300 |
| O | -3.61845500 | 0.24171000  | -0.03876000 |
| C | -5.01691000 | -0.07420500 | -0.03365500 |
| H | -5.26079300 | -0.64129900 | 0.86872000  |
| H | -5.26206200 | -0.66684900 | -0.91906000 |
| C | -5.72738300 | 1.26326300  | -0.05250500 |
| H | -5.47896800 | 1.85750700  | 0.83096600  |
| H | -5.48596100 | 1.82846700  | -0.95667000 |
| O | -7.12602400 | 0.94843100  | -0.04140800 |
| H | 16.47334000 | 4.14147200  | 0.24031200  |
| C | 9.76341000  | -0.20341700 | 0.00589400  |
| C | 11.10550900 | 0.15133300  | 0.02264100  |

|   |              |             |             |
|---|--------------|-------------|-------------|
| C | 12.08856100  | -0.84137400 | -0.01052500 |
| C | 11.72466900  | -2.18907700 | -0.06000000 |
| C | 10.38404100  | -2.54370100 | -0.07570100 |
| C | 9.40075500   | -1.55209400 | -0.04296400 |
| H | 9.00335600   | 0.56939500  | 0.03187700  |
| H | 11.38352000  | 1.19852600  | 0.06121200  |
| H | 12.49088400  | -2.95666500 | -0.08511400 |
| H | 10.09759200  | -3.58935300 | -0.11363000 |
| C | 13.53894500  | -0.50244000 | 0.00685100  |
| O | 14.43336500  | -1.33242600 | -0.03505200 |
| O | 13.76690100  | 0.80548800  | 0.07484800  |
| C | 15.13873200  | 1.23129200  | 0.10002900  |
| H | 15.64051700  | 0.89222200  | -0.81068800 |
| H | 15.63589400  | 0.80006400  | 0.97355400  |
| C | 15.10436700  | 2.74400500  | 0.17756700  |
| H | 14.58237400  | 3.15225800  | -0.69633900 |
| H | 14.57659900  | 3.06109700  | 1.08526500  |
| O | 16.45849800  | 3.17523800  | 0.20373000  |
| C | 7.97379400   | -1.97508400 | -0.06047100 |
| O | 7.60511600   | -3.13785500 | -0.08824900 |
| C | -9.76338900  | 0.20344600  | 0.00705200  |
| C | -11.10547600 | -0.15136200 | 0.02349600  |
| C | -12.08856400 | 0.84127500  | -0.01065600 |
| C | -11.72472100 | 2.18896900  | -0.06076500 |
| C | -10.38410500 | 2.54365300  | -0.07617500 |
| C | -9.40078500  | 1.55211100  | -0.04249400 |
| H | -9.00330400  | -0.56930700 | 0.03382800  |
| H | -11.38344700 | -1.19854400 | 0.06261700  |
| H | -12.49096200 | 2.95650600  | -0.08663500 |
| H | -10.09768900 | 3.58929400  | -0.11463400 |
| C | -13.53893700 | 0.50228100  | 0.00637000  |

|   |              |             |             |
|---|--------------|-------------|-------------|
| O | -14.43338200 | 1.33221900  | -0.03592200 |
| O | -13.76685700 | -0.80564800 | 0.07450100  |
| C | -15.13867800 | -1.23148900 | 0.09958500  |
| H | -15.64041000 | -0.89248400 | -0.81118300 |
| H | -15.63591000 | -0.80022600 | 0.97305500  |
| C | -15.10429600 | -2.74419900 | 0.17720300  |
| H | -14.58223200 | -3.15248600 | -0.69664400 |
| H | -14.57660400 | -3.06124900 | 1.08495900  |
| O | -16.45843200 | -3.17542600 | 0.20327600  |
| H | -16.47329700 | -4.14166300 | 0.23975300  |
| C | -7.97383800  | 1.97515000  | -0.05981800 |
| O | -7.60519500  | 3.13792600  | -0.08784500 |
|   |              |             |             |
| 3 |              |             |             |
| C | 0.84503100   | 0.35568300  | -0.86126600 |
| C | -0.54009600  | 0.45476600  | -0.85295400 |
| C | -1.28557900  | -0.12409900 | -1.88308700 |
| C | -0.64182000  | -0.80464700 | -2.91913900 |
| C | 0.74189700   | -0.90429900 | -2.92796500 |
| C | 1.48843900   | -0.32406700 | -1.89964500 |
| H | 1.41995000   | 0.80436100  | -0.05901500 |
| H | -1.03685400  | 0.97461700  | -0.04179300 |
| H | -1.22482400  | -1.25485300 | -3.71550800 |
| H | 1.24450000   | -1.43199500 | -3.73160600 |
| C | -2.77338000  | -0.06166600 | -1.90167500 |
| O | -3.46622100  | -0.62822300 | -2.73005900 |
| O | -3.27162900  | 0.69953600  | -0.92530200 |
| C | -4.69641800  | 0.82877600  | -0.83172000 |
| H | -4.85858800  | 1.75678800  | -0.28247800 |
| H | -5.13258300  | 0.90909600  | -1.82986600 |
| C | -5.26853100  | -0.35257000 | -0.06657500 |



|   |              |             |             |
|---|--------------|-------------|-------------|
| H | -4.80580800  | -0.44341600 | 0.91951400  |
| H | -5.15420300  | -1.29098800 | -0.61415200 |
| O | -6.66544500  | -0.05269100 | 0.08175300  |
| C | 2.97007600   | -0.45754000 | -1.94370300 |
| O | 3.57784300   | -1.05230100 | -2.81895800 |
| O | 3.57805700   | 0.14339200  | -0.92255100 |
| C | 5.00884300   | 0.05480800  | -0.87554000 |
| H | 5.43481500   | 0.51661300  | -1.77025600 |
| H | 5.30643100   | -0.99581900 | -0.82626200 |
| C | 5.41676100   | 0.81413000  | 0.37450900  |
| H | 5.11813500   | 1.86068100  | 0.30893600  |
| H | 4.99354800   | 0.36338100  | 1.27455600  |
| O | 6.84885600   | 0.83963000  | 0.45951800  |
| H | 17.07076800  | 3.62297800  | -0.72123300 |
| C | -9.31651300  | 0.63041300  | 0.25199100  |
| C | -10.66008600 | 0.96226900  | 0.36189200  |
| C | -11.53024200 | 0.12114400  | 1.06056700  |
| C | -11.05190500 | -1.05250800 | 1.64786200  |
| C | -9.71000800  | -1.38464800 | 1.53711900  |
| C | -8.83912500  | -0.54422000 | 0.83961700  |
| H | -8.64511500  | 1.28572600  | -0.29129100 |
| H | -11.02700600 | 1.87394300  | -0.09596700 |
| H | -11.73092300 | -1.70239500 | 2.18958500  |
| H | -9.33509900  | -2.29553800 | 1.99163000  |
| C | -12.97753500 | 0.44150700  | 1.20287500  |
| O | -13.77511400 | -0.26009800 | 1.80480700  |
| O | -13.32132100 | 1.57848700  | 0.60492700  |
| C | -14.70025100 | 1.97114100  | 0.69266100  |
| H | -14.97416900 | 2.09917000  | 1.74378800  |
| H | -15.32743600 | 1.19586900  | 0.24348000  |
| C | -14.81416900 | 3.27739500  | -0.06646800 |

|   |              |             |             |
|---|--------------|-------------|-------------|
| H | -14.15638000 | 4.03136600  | 0.38270300  |
| H | -14.52196700 | 3.13055600  | -1.11329300 |
| O | -16.17600200 | 3.67481700  | 0.02710400  |
| H | -16.28952600 | 4.50592000  | -0.45405800 |
| C | -7.40608000  | -0.93862700 | 0.74377100  |
| O | -6.94708700  | -1.96414200 | 1.21896100  |
| C | -1.92497600  | -3.38314100 | -0.70757000 |
| H | -2.27213200  | -4.44170400 | -0.70182200 |
| H | -2.07240500  | -3.03907700 | -1.75569500 |
| C | -0.41486300  | -3.42734600 | -0.50651500 |
| H | -0.02118900  | -2.40378900 | -0.44749200 |
| H | 0.06417500   | -3.94140800 | -1.35384400 |
| O | -2.60267600  | -2.60036500 | 0.21197400  |
| O | -0.12083400  | -4.12467700 | 0.71127900  |
| H | 0.81948600   | -4.03631600 | 0.89892400  |
| C | 10.96619000  | 1.12938400  | 0.48084600  |
| C | 9.58103300   | 1.03826500  | 0.45465500  |
| C | 8.94494300   | -0.06329100 | 1.03334000  |
| C | 9.69851900   | -1.07178700 | 1.63883500  |
| C | 11.08184100  | -0.97896700 | 1.66767900  |
| C | 11.71895600  | 0.12067200  | 1.08785600  |
| H | 11.45601400  | 1.98460500  | 0.02927100  |
| H | 9.00047500   | 1.82256100  | -0.01759200 |
| H | 9.20048700   | -1.92540700 | 2.08611000  |
| H | 11.67003700  | -1.75982000 | 2.13786500  |
| C | 7.46294400   | -0.20499800 | 1.02046600  |
| O | 6.86725700   | -1.16692400 | 1.47491300  |
| C | 13.20649700  | 0.17981700  | 1.13741500  |
| O | 13.90378700  | -0.66206600 | 1.68108600  |
| O | 13.70669200  | 1.24847800  | 0.52415700  |
| C | 15.13627900  | 1.39124100  | 0.52136800  |

|   |             |            |             |
|---|-------------|------------|-------------|
| H | 15.58598100 | 0.52679000 | 0.02478000  |
| H | 15.49625900 | 1.44834000 | 1.55256300  |
| C | 15.42929800 | 2.67161800 | -0.23371000 |
| H | 15.04551200 | 2.59951900 | -1.25853100 |
| H | 14.94804800 | 3.52108900 | 0.26599500  |
| O | 16.84330800 | 2.81976200 | -0.23294900 |

TS<sub>3/4</sub>

|   |             |             |             |
|---|-------------|-------------|-------------|
| C | 1.26247000  | -0.81791900 | -0.13592800 |
| C | -0.08310800 | -1.16476400 | -0.12987700 |
| C | -1.06305900 | -0.18815700 | 0.05498700  |
| C | -0.68511300 | 1.14785500  | 0.22242600  |
| C | 0.65635900  | 1.49703000  | 0.21816000  |
| C | 1.63825300  | 0.51638600  | 0.04117700  |
| H | 2.01497100  | -1.58603000 | -0.27817800 |
| H | -0.37521800 | -2.19996500 | -0.27276700 |
| H | -1.43937600 | 1.91338500  | 0.36739700  |
| H | 0.94764700  | 2.53395500  | 0.35152300  |
| C | -2.50162600 | -0.61434300 | 0.07067400  |
| O | -2.85533800 | -1.76019400 | -0.23216900 |
| O | -3.34178900 | 0.44514500  | -0.06600000 |
| C | -4.72880200 | 0.13420600  | -0.13802200 |
| H | -5.01837500 | -0.49708000 | 0.70824200  |
| H | -4.95332400 | -0.38927800 | -1.07291600 |
| C | -5.44337300 | 1.46847900  | -0.08187500 |
| H | -5.15335300 | 2.11115100  | -0.91778100 |
| H | -5.24797800 | 1.98382700  | 0.86241600  |
| O | -6.84308400 | 1.16366200  | -0.17872100 |
| C | 3.06152200  | 0.93238600  | 0.05278900  |
| O | 3.44642400  | 2.06658100  | 0.29401300  |
| O | 3.90259600  | -0.06476100 | -0.22913200 |

|   |              |             |             |
|---|--------------|-------------|-------------|
| C | 5.30155400   | 0.24467100  | -0.21423000 |
| H | 5.59623900   | 0.55573600  | 0.79191600  |
| H | 5.50986200   | 1.04982600  | -0.92366900 |
| C | 5.99817500   | -1.03726600 | -0.62073500 |
| H | 5.77497600   | -1.85042500 | 0.07524800  |
| H | 5.72134600   | -1.33466800 | -1.63559500 |
| O | 7.40001700   | -0.73803400 | -0.57168700 |
| H | 16.83866600  | 3.72740100  | 1.56367700  |
| C | -9.47827600  | 0.42701100  | -0.33909200 |
| C | -10.81860700 | 0.07761900  | -0.43323800 |
| C | -11.79893300 | 1.07358100  | -0.44152900 |
| C | -11.43393000 | 2.41909400  | -0.35434500 |
| C | -10.09505600 | 2.76813800  | -0.25982600 |
| C | -9.11441700  | 1.77342100  | -0.25246300 |
| H | -8.72043300  | -0.34838600 | -0.33245700 |
| H | -11.09734200 | -0.96796700 | -0.49988400 |
| H | -12.19781700 | 3.18940500  | -0.36127700 |
| H | -9.80789400  | 3.81208300  | -0.19214200 |
| C | -13.24694400 | 0.74032400  | -0.54268500 |
| O | -14.13998100 | 1.57303100  | -0.54394400 |
| O | -13.47523700 | -0.56633200 | -0.63290300 |
| C | -14.84500600 | -0.98706500 | -0.73549700 |
| H | -15.29487800 | -0.54296700 | -1.62802000 |
| H | -15.39265300 | -0.65824300 | 0.15230300  |
| C | -14.81017400 | -2.49866900 | -0.83200500 |
| H | -14.23267900 | -2.80441300 | -1.71290000 |
| H | -14.33953500 | -2.92112900 | 0.06398000  |
| O | -16.16175800 | -2.92557400 | -0.94150200 |
| H | -16.17649500 | -3.89105200 | -0.99665900 |
| C | -7.68847800  | 2.19008100  | -0.15036400 |
| O | -7.32214000  | 3.35036000  | -0.05202200 |

|   |             |             |             |
|---|-------------|-------------|-------------|
| C | -1.98771600 | -1.70409600 | 2.70100800  |
| H | -1.88427900 | -2.50338200 | 1.93802900  |
| H | -0.97238100 | -1.51325100 | 3.10194800  |
| C | -2.84804700 | -2.26056100 | 3.83209900  |
| H | -2.84347900 | -1.56581000 | 4.68526700  |
| H | -2.48537300 | -3.23594300 | 4.17377100  |
| O | -2.58062200 | -0.57592300 | 2.15632500  |
| O | -4.18692400 | -2.43395400 | 3.36561200  |
| H | -4.32163200 | -1.68639800 | 2.75909300  |
| C | 10.04873300 | -0.08143200 | -0.29001200 |
| C | 11.39483500 | 0.24560100  | -0.19761400 |
| C | 12.36333600 | -0.65969300 | -0.63947100 |
| C | 11.98099700 | -1.89303000 | -1.17227100 |
| C | 10.63671300 | -2.22265100 | -1.25842300 |
| C | 9.66773900  | -1.31757400 | -0.81881100 |
| H | 9.30045700  | 0.62357200  | 0.05409200  |
| H | 11.68725700 | 1.20433900  | 0.21559800  |
| H | 12.73568400 | -2.59292000 | -1.51488500 |
| H | 10.33645200 | -3.18108600 | -1.66844900 |
| C | 13.81708900 | -0.34578900 | -0.55977900 |
| O | 14.69601000 | -1.06989800 | -0.99988500 |
| O | 14.06738000 | 0.81116400  | 0.04593000  |
| C | 15.44471000 | 1.20091600  | 0.16984100  |
| H | 15.87949900 | 1.31453500  | -0.82737600 |
| H | 15.99134800 | 0.43089100  | 0.72145900  |
| C | 15.44085400 | 2.51550200  | 0.92304400  |
| H | 14.86971500 | 3.26745700  | 0.36498200  |
| H | 14.97954300 | 2.38006600  | 1.90871000  |
| O | 16.80124900 | 2.90765400  | 1.05197900  |
| C | 8.23633400  | -1.71237300 | -0.92392600 |
| O | 7.85529400  | -2.81152300 | -1.29212000 |

|   |             |             |             |
|---|-------------|-------------|-------------|
| 4 |             |             |             |
| C | 1.21881800  | -1.05338000 | -0.19829200 |
| C | -0.12267600 | -1.40645200 | -0.30772600 |
| C | -1.07314400 | -0.86899400 | 0.55678500  |
| C | -0.66238000 | 0.03537800  | 1.54266200  |
| C | 0.67109600  | 0.39914300  | 1.65515500  |
| C | 1.62201100  | -0.14649200 | 0.78505700  |
| H | 1.94588800  | -1.48199700 | -0.87998400 |
| H | -0.43673300 | -2.10851100 | -1.07351500 |
| H | -1.39138500 | 0.45503400  | 2.22932200  |
| H | 0.98196700  | 1.10316700  | 2.42073200  |
| C | -2.54957800 | -1.30204200 | 0.45125100  |
| O | -2.83984200 | -2.11989300 | -0.51752900 |
| O | -3.27585500 | -0.04947700 | 0.42159800  |
| C | -4.66280200 | -0.17811500 | 0.17139800  |
| H | -5.11135500 | -0.94958200 | 0.80891900  |
| H | -4.85292200 | -0.43533600 | -0.87768800 |
| C | -5.26692500 | 1.17405600  | 0.49291700  |
| H | -4.83273600 | 1.96228500  | -0.12885600 |
| H | -5.13666600 | 1.42823300  | 1.54854800  |
| O | -6.67194100 | 1.06413400  | 0.20387600  |
| C | 3.03813700  | 0.25998400  | 0.94204000  |
| O | 3.43421200  | 1.08804500  | 1.74925200  |
| O | 3.86470000  | -0.37554100 | 0.10741700  |
| C | 5.25522600  | -0.04456000 | 0.19907100  |
| H | 5.61677500  | -0.24937700 | 1.21040600  |
| H | 5.39737200  | 1.01429500  | -0.03407600 |
| C | 5.94717500  | -0.92869300 | -0.81746700 |
| H | 5.80565200  | -1.98743800 | -0.58442600 |
| H | 5.59408900  | -0.72419000 | -1.83178200 |

|   |              |             |             |
|---|--------------|-------------|-------------|
| O | 7.33893200   | -0.59677600 | -0.71819100 |
| H | 16.63011300  | 3.84218300  | 2.00167100  |
| C | -9.33334100  | 0.67575200  | -0.32561000 |
| C | -10.68239600 | 0.50761700  | -0.60720700 |
| C | -11.56187200 | 1.58498900  | -0.47042100 |
| C | -11.08730900 | 2.82989000  | -0.05052400 |
| C | -9.74016000  | 2.99702600  | 0.23348500  |
| C | -8.86013800  | 1.92100200  | 0.09635400  |
| H | -8.65354000  | -0.16199400 | -0.43298900 |
| H | -11.04598500 | -0.46032300 | -0.93313500 |
| H | -11.77357400 | 3.66363100  | 0.05373200  |
| H | -9.36807700  | 3.96193300  | 0.56113300  |
| C | -13.01546100 | 1.44653200  | -0.76309400 |
| O | -13.81748900 | 2.36373200  | -0.68357300 |
| O | -13.35947400 | 0.21340400  | -1.12262500 |
| C | -14.74474800 | -0.01794400 | -1.42438100 |
| H | -15.04692400 | 0.62545900  | -2.25558600 |
| H | -15.35081700 | 0.21368500  | -0.54387900 |
| C | -14.85279200 | -1.48265400 | -1.79630400 |
| H | -14.22216300 | -1.69594600 | -2.66784700 |
| H | -14.52191900 | -2.10805800 | -0.95824200 |
| O | -16.22230900 | -1.72014000 | -2.09379500 |
| H | -16.32581100 | -2.64631200 | -2.35201700 |
| C | -7.42122400  | 2.14090500  | 0.41335300  |
| O | -6.96903100  | 3.19859600  | 0.82399400  |
| C | -2.34624500  | -3.06248000 | 2.12635500  |
| H | -2.46754400  | -3.78521100 | 1.30924600  |
| H | -1.27173600  | -2.95190800 | 2.33979500  |
| C | -3.04830700  | -3.56812600 | 3.36707800  |
| H | -2.94266100  | -2.83831500 | 4.18127700  |
| H | -2.59365400  | -4.50975900 | 3.68646400  |

|   |             |             |             |
|---|-------------|-------------|-------------|
| O | -2.92522300 | -1.81884400 | 1.78094900  |
| O | -4.42667100 | -3.84062900 | 3.12827400  |
| H | -4.82555900 | -3.03841200 | 2.76857200  |
| C | 9.95840800  | 0.14590200  | -0.41911500 |
| C | 11.29232800 | 0.50453300  | -0.28033900 |
| C | 12.26871900 | -0.13460900 | -1.04906300 |
| C | 11.90613300 | -1.13219400 | -1.95715700 |
| C | 10.57347700 | -1.49006500 | -2.09652700 |
| C | 9.59692400  | -0.85247000 | -1.32773100 |
| H | 9.20370400  | 0.64355900  | 0.17932100  |
| H | 11.56873600 | 1.27968200  | 0.42533900  |
| H | 12.66757200 | -1.62532300 | -2.55202900 |
| H | 10.28825200 | -2.26431100 | -2.80080500 |
| C | 13.71034600 | 0.21941300  | -0.92865600 |
| O | 14.59969700 | -0.31601000 | -1.57130700 |
| O | 13.93719400 | 1.18556700  | -0.04382200 |
| C | 15.30116900 | 1.59643500  | 0.14166300  |
| H | 15.70296300 | 1.95937600  | -0.80853500 |
| H | 15.89264400 | 0.74358400  | 0.48678600  |
| C | 15.26809100 | 2.69917300  | 1.18013400  |
| H | 14.65439600 | 3.53395800  | 0.82071600  |
| H | 14.83900100 | 2.32130800  | 2.11614400  |
| O | 16.61596000 | 3.10882000  | 1.37133500  |
| C | 8.17799000  | -1.26629200 | -1.50560900 |
| O | 7.80905500  | -2.12774600 | -2.28709400 |

TS<sub>4/5</sub>

|   |            |             |             |
|---|------------|-------------|-------------|
| C | 0.06190500 | -3.34363500 | 0.00269900  |
| C | 1.15078700 | -4.19240700 | 0.12116500  |
| C | 2.39113900 | -3.83484400 | -0.41520200 |
| C | 2.52773700 | -2.61228800 | -1.07738000 |



|   |             |             |             |
|---|-------------|-------------|-------------|
| C | 1.43792100  | -1.75754400 | -1.19718400 |
| C | 0.20155100  | -2.11739500 | -0.65982500 |
| H | -0.89530000 | -3.63343500 | 0.42242200  |
| H | 1.04447000  | -5.14127100 | 0.63706000  |
| H | 3.48074400  | -2.32744600 | -1.50924500 |
| H | 1.54847900  | -0.80956400 | -1.71385900 |
| C | 3.53867000  | -4.79444000 | -0.26927900 |
| O | 3.35681100  | -6.00687000 | -0.06384500 |
| O | 4.01121600  | -4.17453700 | 1.59462200  |
| C | 4.41959200  | -2.85665900 | 1.73529300  |
| H | 4.03931100  | -2.41013500 | 2.67201000  |
| H | 4.03511200  | -2.21652600 | 0.91852800  |
| C | 5.94443000  | -2.74258300 | 1.74251700  |
| H | 6.38839800  | -3.25822800 | 0.89039900  |
| H | 6.37268900  | -3.13665500 | 2.66581700  |
| O | 6.35212100  | -1.35048600 | 1.72583600  |
| C | -0.93845400 | -1.18295400 | -0.81976400 |
| O | -0.87023100 | -0.09735800 | -1.37678300 |
| O | -2.07364500 | -1.64653800 | -0.29250300 |
| C | -3.23360800 | -0.81572600 | -0.41978700 |
| H | -3.44204200 | -0.63565600 | -1.47799700 |
| H | -3.06224200 | 0.13703400  | 0.08843600  |
| C | -4.35690300 | -1.59476600 | 0.23234200  |
| H | -4.50938800 | -2.55806200 | -0.26180100 |
| H | -4.16814800 | -1.75274800 | 1.29753200  |
| O | -5.52609900 | -0.78117000 | 0.06633800  |
| C | 6.80643000  | 1.49848600  | -0.46577200 |
| C | 7.10678700  | 2.85078100  | -0.38536700 |
| C | 7.28482000  | 3.44860700  | 0.86540700  |
| C | 7.16350800  | 2.68806300  | 2.03055900  |
| C | 6.86571500  | 1.33518200  | 1.94982000  |

|   |              |             |             |
|---|--------------|-------------|-------------|
| C | 6.68606800   | 0.73742800  | 0.69926500  |
| H | 6.66411900   | 1.03035600  | -1.43402400 |
| H | 7.19933300   | 3.43676800  | -1.29277100 |
| H | 7.30169300   | 3.15623300  | 2.99936000  |
| H | 6.77052000   | 0.74914600  | 2.85686500  |
| C | 7.60113800   | 4.89781500  | 0.99758000  |
| O | 7.73700200   | 5.47231800  | 2.06635900  |
| O | 7.72123300   | 5.51283700  | -0.17521700 |
| C | 8.01575600   | 6.91862300  | -0.15108200 |
| H | 8.96377100   | 7.08231700  | 0.36908300  |
| H | 7.21481500   | 7.44709700  | 0.37377400  |
| C | 8.10235800   | 7.35101200  | -1.60053200 |
| H | 8.89917900   | 6.79582200  | -2.11008600 |
| H | 7.15115200   | 7.15142800  | -2.10879900 |
| O | 8.38576000   | 8.74393400  | -1.58862300 |
| H | 8.45962400   | 9.05057000  | -2.50288800 |
| C | 6.35527300   | -0.70961100 | 0.56722600  |
| O | 6.11536900   | -1.24121700 | -0.51028800 |
| C | 5.71256800   | -5.27642400 | -1.09380400 |
| H | 6.14591100   | -5.49107900 | -0.10979800 |
| H | 5.34691000   | -6.21042500 | -1.53292400 |
| C | 6.73753500   | -4.65886700 | -2.01780500 |
| H | 6.24790600   | -4.34721900 | -2.95040600 |
| H | 7.47850800   | -5.42503500 | -2.26308300 |
| O | 4.63168000   | -4.35366400 | -0.95253500 |
| O | 7.45566800   | -3.57669800 | -1.44430600 |
| H | 6.84658100   | -2.85055700 | -1.23194200 |
| C | -10.19213000 | 0.05160100  | 0.54670600  |
| C | -9.08670200  | -0.75978200 | 0.75870500  |
| C | -7.82854200  | -0.36046300 | 0.30251400  |
| C | -7.67709100  | 0.85767300  | -0.36599200 |

|   |              |             |             |
|---|--------------|-------------|-------------|
| C | -8.78264500  | 1.66905500  | -0.57757600 |
| C | -10.04138700 | 1.26857400  | -0.12407600 |
| H | -11.16718000 | -0.26321500 | 0.90103900  |
| H | -9.19982900  | -1.70575500 | 1.27744900  |
| H | -6.70227900  | 1.17198900  | -0.72145500 |
| H | -8.66956400  | 2.61462200  | -1.09704100 |
| C | -6.67108000  | -1.26535900 | 0.54272400  |
| O | -6.74975900  | -2.34206000 | 1.11166500  |
| C | -11.20319100 | 2.16514400  | -0.37988500 |
| O | -11.12365100 | 3.23530200  | -0.96267200 |
| O | -12.34761200 | 1.67954900  | 0.09069900  |
| C | -13.53315000 | 2.46597900  | -0.11928800 |
| H | -13.68501800 | 2.60622500  | -1.19390100 |
| H | -13.41326700 | 3.44000200  | 0.36305700  |
| C | -14.67723500 | 1.68126600  | 0.50082300  |
| H | -14.73682000 | 0.68141300  | 0.05489100  |
| H | -14.52135600 | 1.57406200  | 1.57706800  |
| O | -15.90092300 | 2.38286100  | 0.33706600  |
| H | -16.16373000 | 2.34105100  | -0.59373400 |
|   |              |             |             |
| 5 |              |             |             |
| C | -0.50694900  | -3.41375600 | 0.53213300  |
| C | -1.81208500  | -3.78896300 | 0.82054500  |
| C | -2.50668100  | -4.62616600 | -0.05684700 |
| C | -1.89206900  | -5.08296100 | -1.22512200 |
| C | -0.58804900  | -4.70884700 | -1.51335500 |
| C | 0.10775700   | -3.87472400 | -0.63508700 |
| H | 0.02870700   | -2.76503100 | 1.21599100  |
| H | -2.28617900  | -3.43034200 | 1.72715200  |
| H | -2.43532200  | -5.73098600 | -1.90467100 |
| H | -0.10693100  | -5.06355700 | -2.41867000 |

|   |             |             |             |
|---|-------------|-------------|-------------|
| C | -3.90758300 | -5.05509400 | 0.21934600  |
| O | -4.55418300 | -5.77366800 | -0.52635000 |
| O | -9.59081800 | -2.78980800 | 0.33304600  |
| C | -9.10298400 | -1.48638500 | 0.40327800  |
| H | -9.91798000 | -0.74227300 | 0.46108500  |
| H | -8.47349700 | -1.32640300 | 1.30145500  |
| C | -8.25456900 | -1.16491100 | -0.82185000 |
| H | -8.85160000 | -1.19711000 | -1.73865600 |
| H | -7.41373100 | -1.85956200 | -0.91352300 |
| O | -7.73311500 | 0.17305400  | -0.65113100 |
| C | 1.50753300  | -3.50228900 | -0.97716000 |
| O | 2.09129800  | -3.88142700 | -1.97933300 |
| O | 2.07107600  | -2.70647600 | -0.07023100 |
| C | 3.42785100  | -2.30717100 | -0.30912300 |
| H | 3.48830400  | -1.75739200 | -1.25208700 |
| H | 4.06440800  | -3.19428100 | -0.35822100 |
| C | 3.79259600  | -1.41605100 | 0.86511400  |
| H | 3.15926000  | -0.52890800 | 0.89096000  |
| H | 3.71812800  | -1.95197600 | 1.81366500  |
| O | 5.12531600  | -0.91696400 | 0.68259500  |
| H | 13.44752700 | 5.24967100  | -1.85306000 |
| C | -6.75975700 | 2.67693700  | -0.10567800 |
| C | -6.26774900 | 3.95112100  | 0.14279900  |
| C | -5.44151800 | 4.57423300  | -0.79636300 |
| C | -5.11029400 | 3.91776300  | -1.98411100 |
| C | -5.60148500 | 2.64435900  | -2.23153800 |
| C | -6.42725500 | 2.02035100  | -1.29357400 |
| H | -7.39931100 | 2.19688500  | 0.62635400  |
| H | -6.52773700 | 4.45540200  | 1.06659600  |
| H | -4.46890300 | 4.40475100  | -2.71109200 |
| H | -5.34546000 | 2.13159600  | -3.15266800 |

|   |             |             |             |
|---|-------------|-------------|-------------|
| C | -4.89143400 | 5.93867300  | -0.56618200 |
| O | -4.16182600 | 6.52223000  | -1.35240300 |
| O | -5.27521500 | 6.46583000  | 0.59270300  |
| C | -4.79147100 | 7.78119100  | 0.90734200  |
| H | -5.13042500 | 8.48501200  | 0.14188000  |
| H | -3.69813300 | 7.76875800  | 0.93450800  |
| C | -5.37123400 | 8.12298100  | 2.26482800  |
| H | -6.46694200 | 8.10920100  | 2.21877700  |
| H | -5.03892900 | 7.38912200  | 3.00905300  |
| O | -4.89595500 | 9.42254400  | 2.59094100  |
| H | -5.24566600 | 9.66968600  | 3.45823700  |
| C | -6.93099100 | 0.64859700  | -1.59222500 |
| O | -6.63306900 | 0.02377700  | -2.60014800 |
| C | -5.72955200 | -4.89533100 | 1.74431600  |
| H | -5.95784800 | -5.92725300 | 1.46710600  |
| H | -5.74624500 | -4.79528700 | 2.83092800  |
| C | -6.69938200 | -3.91621200 | 1.10251300  |
| H | -6.67411300 | -4.03457000 | 0.00929900  |
| H | -6.37150100 | -2.89091300 | 1.33576900  |
| O | -4.37435500 | -4.57725000 | 1.36969500  |
| O | -7.98332000 | -4.17949600 | 1.61665600  |
| H | -8.68081700 | -3.61274000 | 1.06570300  |
| C | 8.84230600  | 0.76793400  | 0.06323100  |
| C | 7.58569100  | 0.21509400  | 0.27057600  |
| C | 7.46952600  | -1.05529200 | 0.84113100  |
| C | 8.61391600  | -1.77025100 | 1.20282500  |
| C | 9.86887900  | -1.21803000 | 0.99530400  |
| C | 9.98626800  | 0.05182000  | 0.42516000  |
| H | 8.92791100  | 1.75374400  | -0.37959300 |
| H | 6.70045600  | 0.77362000  | -0.01154300 |
| H | 8.51920500  | -2.75656500 | 1.64437200  |

|   |             |             |             |
|---|-------------|-------------|-------------|
| H | 10.75986400 | -1.77069000 | 1.27377700  |
| C | 6.14225100  | -1.68583500 | 1.07965200  |
| O | 5.99201200  | -2.78441800 | 1.58700000  |
| C | 11.35299600 | 0.60625000  | 0.21728200  |
| O | 12.37937000 | 0.01603200  | 0.51496900  |
| O | 11.34736700 | 1.81743400  | -0.33141200 |
| C | 12.62426900 | 2.42729800  | -0.57961800 |
| H | 13.20080300 | 1.79453200  | -1.26045600 |
| H | 13.16463000 | 2.53482600  | 0.36511900  |
| C | 12.33163800 | 3.77740500  | -1.20168900 |
| H | 11.76044500 | 3.64750200  | -2.12893700 |
| H | 11.74602700 | 4.39241500  | -0.50775700 |
| O | 13.59407900 | 4.37569200  | -1.46584300 |
| 6 |             |             |             |
| C | 0.04377200  | -3.35081300 | -0.20962200 |
| C | 1.40040700  | -3.59768000 | -0.37185000 |
| C | 2.08503900  | -4.37195900 | 0.56886800  |
| C | 1.40781800  | -4.89709600 | 1.67205000  |
| C | 0.05276800  | -4.65075700 | 1.83439600  |
| C | -0.63214200 | -3.87704100 | 0.89445300  |
| H | -0.48346600 | -2.74930600 | -0.94148700 |
| H | 1.92167300  | -3.18617000 | -1.22870500 |
| H | 1.94352200  | -5.49600800 | 2.40082600  |
| H | -0.47575400 | -5.05679800 | 2.69035200  |
| C | 3.54250500  | -4.65530100 | 0.43636000  |
| O | 4.17917400  | -5.31230200 | 1.24441400  |
| O | 8.88562200  | -1.54063200 | 0.82604400  |
| C | 8.17311200  | -0.35922900 | 0.61072900  |
| H | 8.84240600  | 0.51871300  | 0.56750400  |
| H | 7.61890300  | -0.37960700 | -0.34744500 |

|   |              |             |             |
|---|--------------|-------------|-------------|
| C | 7.16934100   | -0.14340800 | 1.73402800  |
| H | 7.67303900   | -0.01725600 | 2.69745300  |
| H | 6.46527500   | -0.97845100 | 1.80061200  |
| O | 6.43441900   | 1.06222300  | 1.42958900  |
| C | -2.08473500  | -3.63285800 | 1.10799500  |
| O | -2.71910900  | -4.06545900 | 2.05633300  |
| O | -2.63383800  | -2.88485900 | 0.15274100  |
| C | -4.03180300  | -2.59156300 | 0.28269900  |
| H | -4.20680400  | -2.04933100 | 1.21585100  |
| H | -4.60120600  | -3.52437800 | 0.28662200  |
| C | -4.37252800  | -1.72658300 | -0.91800400 |
| H | -3.77790700  | -0.81267100 | -0.91789700 |
| H | -4.22560300  | -2.26411000 | -1.85723700 |
| O | -5.73297200  | -1.28449700 | -0.80807800 |
| H | -14.35085300 | 4.53841400  | 1.40367700  |
| C | 5.15491200   | 3.37184700  | 0.69593100  |
| C | 4.48417600   | 4.53281400  | 0.33583600  |
| C | 3.42658000   | 4.99853600  | 1.12167000  |
| C | 3.04364000   | 4.29876800  | 2.26842400  |
| C | 3.71491200   | 3.13963100  | 2.62862800  |
| C | 4.77190100   | 2.67283000  | 1.84378400  |
| H | 5.97517000   | 3.01457800  | 0.08361000  |
| H | 4.78609100   | 5.07187000  | -0.55497100 |
| H | 2.22177800   | 4.66317500  | 2.87567800  |
| H | 3.41991800   | 2.59437900  | 3.51892100  |
| C | 2.68144000   | 6.23870600  | 0.76957900  |
| O | 1.75233600   | 6.68549600  | 1.42378600  |
| O | 3.13095400   | 6.81929700  | -0.33898100 |
| C | 2.47375200   | 8.02498900  | -0.76039300 |
| H | 2.56211600   | 8.78025200  | 0.02574000  |
| H | 1.41699900   | 7.81514000  | -0.94879100 |

|   |              |             |             |
|---|--------------|-------------|-------------|
| C | 3.18192300   | 8.46334100  | -2.02602100 |
| H | 4.24305000   | 8.64587400  | -1.81734600 |
| H | 3.10104000   | 7.68116700  | -2.79061600 |
| O | 2.53927600   | 9.65667900  | -2.45505600 |
| H | 2.97133100   | 9.96673900  | -3.26306000 |
| C | 5.46935800   | 1.42342400  | 2.26338700  |
| O | 5.18200400   | 0.79357300  | 3.27097500  |
| C | 5.49017500   | -4.27919300 | -0.87663100 |
| H | 5.80420800   | -5.27696300 | -0.56128400 |
| H | 5.62016200   | -4.17659800 | -1.95518300 |
| C | 6.25437700   | -3.19389500 | -0.13676800 |
| H | 6.09156200   | -3.29885600 | 0.94526300  |
| H | 5.86410200   | -2.21230100 | -0.44451700 |
| O | 4.07516000   | -4.11877700 | -0.65896800 |
| O | 7.61903500   | -3.33197800 | -0.46426500 |
| H | 8.14596400   | -2.63944200 | 0.07398500  |
| C | -9.53871000  | 0.23003800  | -0.32807400 |
| C | -8.25267900  | -0.26925000 | -0.48316100 |
| C | -8.05909900  | -1.52664700 | -1.06154100 |
| C | -9.15577000  | -2.28200000 | -1.48396200 |
| C | -10.44045100 | -1.78298900 | -1.32888600 |
| C | -10.63498900 | -0.52656500 | -0.75029300 |
| H | -9.68501400  | 1.20518600  | 0.12250100  |
| H | -7.40468100  | 0.31976500  | -0.15289700 |
| H | -9.00142600  | -3.25795000 | -1.93176300 |
| H | -11.29450900 | -2.36705600 | -1.65499200 |
| C | -6.69707400  | -2.10062200 | -1.24042000 |
| O | -6.47766500  | -3.19517900 | -1.73100100 |
| C | -12.03023800 | -0.02849800 | -0.59571100 |
| O | -13.02052800 | -0.65865600 | -0.93138700 |
| O | -12.09240700 | 1.18143500  | -0.04829900 |



|   |              |             |             |
|---|--------------|-------------|-------------|
| C | -13.39879300 | 1.74325700  | 0.15533000  |
| H | -13.97495600 | 1.08928700  | 0.81617500  |
| H | -13.90982300 | 1.83250100  | -0.80747000 |
| C | -13.17262900 | 3.10153900  | 0.78724600  |
| H | -12.62660800 | 2.98832400  | 1.73172200  |
| H | -12.58521300 | 3.73606000  | 0.11263800  |
| O | -14.46021000 | 3.66038200  | 1.01288100  |
| C | 10.20488900  | -1.12142100 | -2.07763000 |
| H | 9.30402600   | -1.73607400 | -2.22110900 |
| H | 9.90174300   | -0.06391700 | -2.12378400 |
| C | 11.18951300  | -1.40652700 | -3.19567400 |
| H | 11.46251000  | -2.46973000 | -3.18683500 |
| H | 12.10063000  | -0.81157500 | -3.04817800 |
| O | 10.56115400  | -1.06088200 | -4.42771800 |
| H | 11.17026800  | -1.25039700 | -5.14936900 |
| O | 10.82675800  | -1.41981300 | -0.84344600 |
| H | 10.09501700  | -1.48183000 | -0.14122100 |

TS<sub>6/7</sub>

|   |             |             |             |
|---|-------------|-------------|-------------|
| C | -0.36159600 | -3.11564000 | 0.44403200  |
| C | -1.72477400 | -3.26940900 | 0.65835300  |
| C | -2.45262400 | -4.17937400 | -0.11318700 |
| C | -1.81272600 | -4.93338200 | -1.09976900 |
| C | -0.45208900 | -4.77670800 | -1.31707000 |
| C | 0.27630400  | -3.86795300 | -0.54584800 |
| H | 0.20003100  | -2.40875300 | 1.04427900  |
| H | -2.21748100 | -2.68162800 | 1.42464400  |
| H | -2.38194400 | -5.63831200 | -1.69631000 |
| H | 0.04750400  | -5.35911400 | -2.08394800 |
| C | -3.91821700 | -4.36896300 | 0.07857300  |
| O | -4.58890000 | -5.15635800 | -0.56919300 |

|   |             |             |             |
|---|-------------|-------------|-------------|
| O | -8.90670600 | -0.95718000 | -1.06052800 |
| C | -8.13541200 | 0.19467500  | -0.82300700 |
| H | -8.75018900 | 1.10285400  | -0.90938600 |
| H | -7.70183100 | 0.18258200  | 0.19090400  |
| C | -7.00759300 | 0.24410500  | -1.83864100 |
| H | -7.38736100 | 0.40016100  | -2.85275800 |
| H | -6.41400400 | -0.67448000 | -1.81114200 |
| O | -6.16724900 | 1.35631400  | -1.47340700 |
| C | 1.73289900  | -3.72455900 | -0.81623100 |
| O | 2.32118200  | -4.30023500 | -1.71702400 |
| O | 2.34127500  | -2.89602100 | 0.03050700  |
| C | 3.74693500  | -2.68705400 | -0.16469400 |
| H | 3.91773400  | -2.25068000 | -1.15260900 |
| H | 4.27124800  | -3.64286300 | -0.08852800 |
| C | 4.16544900  | -1.72519100 | 0.93344900  |
| H | 3.61087400  | -0.78920000 | 0.86111600  |
| H | 4.02827000  | -2.16166600 | 1.92505800  |
| O | 5.53942500  | -1.35917300 | 0.74117700  |
| H | 14.32103700 | 4.10730800  | -1.70690600 |
| C | -4.64096600 | 3.44882700  | -0.58209000 |
| C | -3.85798000 | 4.51230100  | -0.15380500 |
| C | -2.67694400 | 4.82512300  | -0.83221100 |
| C | -2.28268200 | 4.07037400  | -1.93963200 |
| C | -3.06613600 | 3.00923800  | -2.36863300 |
| C | -4.24685500 | 2.69568900  | -1.69135300 |
| H | -5.55569200 | 3.20849200  | -0.05194600 |
| H | -4.16755700 | 5.09312600  | 0.70768100  |
| H | -1.36547400 | 4.31670300  | -2.46414600 |
| H | -2.76390100 | 2.42265600  | -3.22977700 |
| C | -1.80842000 | 5.95620100  | -0.40313500 |
| O | -0.73401600 | 6.22461300  | -0.91741300 |

|   |             |             |             |
|---|-------------|-------------|-------------|
| O | -2.32336300 | 6.65389100  | 0.60470200  |
| C | -1.55591200 | 7.76560000  | 1.09324300  |
| H | -1.41549400 | 8.49126400  | 0.28702200  |
| H | -0.58134400 | 7.40971600  | 1.43911700  |
| C | -2.36192700 | 8.35714800  | 2.23164100  |
| H | -3.34678700 | 8.67430600  | 1.86783700  |
| H | -2.50061500 | 7.60820700  | 3.02076000  |
| O | -1.62059400 | 9.46899100  | 2.71649600  |
| H | -2.10964200 | 9.86958300  | 3.44862600  |
| C | -5.05934000 | 1.54522300  | -2.17884000 |
| O | -4.74207200 | 0.84339300  | -3.12730100 |
| C | -5.83678400 | -3.63646400 | 1.27732200  |
| H | -6.19274500 | -4.66651300 | 1.20125900  |
| H | -5.95797400 | -3.28050700 | 2.30154500  |
| C | -6.55625600 | -2.72232500 | 0.30077000  |
| H | -6.41663700 | -3.08687100 | -0.72567100 |
| H | -6.12463600 | -1.71359000 | 0.36847000  |
| O | -4.41877900 | -3.58756100 | 1.03370500  |
| O | -7.92608500 | -2.71668800 | 0.65375000  |
| H | -8.38552200 | -2.10618000 | 0.01623500  |
| C | 9.38991500  | -0.01548500 | 0.12634700  |
| C | 8.08874600  | -0.44634000 | 0.34675200  |
| C | 7.85908800  | -1.67826600 | 0.96515000  |
| C | 8.93431600  | -2.47820300 | 1.35944300  |
| C | 10.23404200 | -2.04963100 | 1.13501200  |
| C | 10.46492500 | -0.81729600 | 0.51914400  |
| H | 9.56453000  | 0.94123400  | -0.35277000 |
| H | 7.25671300  | 0.17679500  | 0.03890700  |
| H | 8.75112700  | -3.43420300 | 1.83844200  |
| H | 11.07135100 | -2.66908600 | 1.43839900  |
| C | 6.47978200  | -2.17569300 | 1.22226600  |

|   |              |             |             |
|---|--------------|-------------|-------------|
| O | 6.22850300   | -3.21430700 | 1.80962200  |
| C | 11.87494000  | -0.39225000 | 0.29516900  |
| O | 12.84646400  | -1.07833200 | 0.57078100  |
| O | 11.97263500  | 0.82140900  | -0.23844300 |
| C | 13.29458100  | 1.32119700  | -0.49664300 |
| H | 13.80052200  | 0.65878300  | -1.20481800 |
| H | 13.85898300  | 1.35525500  | 0.43949100  |
| C | 13.10645400  | 2.70838500  | -1.07600100 |
| H | 12.51867900  | 2.65234600  | -2.00025500 |
| H | 12.57568100  | 3.34441700  | -0.35717700 |
| O | 14.40772100  | 3.21840900  | -1.33540400 |
| C | -11.06789400 | -0.43606800 | 1.10590100  |
| H | -10.05465600 | -0.12257200 | 1.42210500  |
| H | -11.76356700 | 0.33370400  | 1.48282600  |
| C | -11.38645700 | -1.75274600 | 1.80472800  |
| H | -10.66232800 | -2.51837300 | 1.49420900  |
| H | -12.39174600 | -2.08865500 | 1.51524000  |
| O | -11.31761100 | -1.54980300 | 3.21789500  |
| H | -11.52164800 | -2.38040600 | 3.66092600  |
| O | -11.15582100 | -0.56232900 | -0.28630500 |
| H | -9.98433100  | -0.77861500 | -0.71490400 |
| 7 |              |             |             |
| C | 2.35272100   | 0.64136600  | -1.33587700 |
| C | 3.73649600   | 0.74906800  | -1.30651200 |
| C | 4.51936700   | -0.16742400 | -2.01420900 |
| C | 3.91600000   | -1.19673100 | -2.74023400 |
| C | 2.53234500   | -1.28880000 | -2.78781300 |
| C | 1.74834700   | -0.36897200 | -2.08946000 |
| H | 1.74759300   | 1.34892400  | -0.78056700 |
| H | 4.20442000   | 1.54043400  | -0.73099800 |

|   |              |             |             |
|---|--------------|-------------|-------------|
| H | 4.52899100   | -1.91163400 | -3.27879400 |
| H | 2.05849400   | -2.07778900 | -3.36183700 |
| C | 6.00582300   | -0.06859200 | -2.03931600 |
| O | 6.74192800   | -0.98892400 | -2.35316900 |
| O | 7.92693500   | -0.17746300 | 2.55603100  |
| C | 6.57267700   | -0.19077500 | 2.17985600  |
| H | 5.91337400   | -0.16970300 | 3.06183500  |
| H | 6.31510600   | 0.67817800  | 1.55250500  |
| C | 6.30354800   | -1.46019000 | 1.39442200  |
| H | 6.60983400   | -2.34597400 | 1.96012300  |
| H | 6.81205800   | -1.45659500 | 0.42668500  |
| O | 4.87938500   | -1.51465900 | 1.19216500  |
| C | 0.26875100   | -0.50389100 | -2.16686100 |
| O | -0.31046500  | -1.29256300 | -2.89560700 |
| O | -0.37172300  | 0.33654000  | -1.35574400 |
| C | -1.80410800  | 0.33107100  | -1.40269200 |
| H | -2.18292900  | -0.68986000 | -1.31481800 |
| H | -2.13200500  | 0.75604800  | -2.35541400 |
| C | -2.24363000  | 1.17629400  | -0.22135500 |
| H | -1.89077400  | 0.74167000  | 0.71486200  |
| H | -1.88905000  | 2.20568300  | -0.30698600 |
| O | -3.67360400  | 1.15124700  | -0.13083700 |
| H | -13.59999300 | -1.68029300 | 2.42349400  |
| C | 2.15038500   | -1.64171200 | 1.19049100  |
| C | 0.76376800   | -1.70413700 | 1.15545400  |
| C | 0.13148600   | -2.66304100 | 0.35976200  |
| C | 0.88914500   | -3.55380100 | -0.40484300 |
| C | 2.27403600   | -3.49731100 | -0.36024600 |
| C | 2.90766600   | -2.54259700 | 0.43797200  |
| H | 2.63854300   | -0.89354400 | 1.80438400  |
| H | 0.17859900   | -1.00391500 | 1.74088500  |

|   |             |             |             |
|---|-------------|-------------|-------------|
| H | 0.39279800  | -4.28933300 | -1.02882100 |
| H | 2.86626200  | -4.18835700 | -0.95048600 |
| C | -1.35235900 | -2.75683000 | 0.28800900  |
| O | -1.95392100 | -3.46481900 | -0.50399100 |
| O | -1.96501800 | -1.98712500 | 1.18329900  |
| C | -3.40091500 | -2.01734300 | 1.20195200  |
| H | -3.74019800 | -3.05044000 | 1.32041200  |
| H | -3.78380600 | -1.61447000 | 0.25943700  |
| C | -3.82718600 | -1.17413700 | 2.38662800  |
| H | -3.33897400 | -1.54145100 | 3.29787200  |
| H | -3.54514100 | -0.12574700 | 2.23412700  |
| O | -5.23918500 | -1.30731400 | 2.48343000  |
| H | -5.56185400 | -0.69522300 | 3.15895000  |
| C | 4.39681800  | -2.50976500 | 0.45868500  |
| O | 5.10480400  | -3.31853600 | -0.12170000 |
| C | 7.85043600  | 1.41859800  | -1.81541200 |
| H | 8.27826600  | 0.86144500  | -2.65193500 |
| H | 7.91909300  | 2.48957100  | -2.01317600 |
| C | 8.53477100  | 1.07486000  | -0.50641200 |
| H | 8.46728000  | -0.00017500 | -0.30633500 |
| H | 8.04645800  | 1.61654600  | 0.31039200  |
| O | 6.43999500  | 1.15067900  | -1.72123600 |
| O | 9.89084800  | 1.47789500  | -0.64291100 |
| H | 10.34268400 | 1.31572500  | 0.19333700  |
| C | -7.75203000 | 0.75876500  | 0.26519300  |
| C | -6.37569000 | 0.86775600  | 0.12091700  |
| C | -5.83861800 | 1.87099000  | -0.68974600 |
| C | -6.68140000 | 2.76300300  | -1.35687200 |
| C | -8.05641200 | 2.65518500  | -1.21055900 |
| C | -8.59511300 | 1.65319300  | -0.39963400 |
| H | -8.16388500 | -0.02198100 | 0.89510700  |

|   |              |             |             |
|---|--------------|-------------|-------------|
| H | -5.72930300  | 0.16962400  | 0.64138800  |
| H | -6.25992000  | 3.53935300  | -1.98661700 |
| H | -8.71428700  | 3.34716700  | -1.72552700 |
| C | -4.36863700  | 2.01717700  | -0.87037100 |
| O | -3.84897300  | 2.83812900  | -1.60736800 |
| C | -10.07647200 | 1.57188100  | -0.26780800 |
| O | -10.85293500 | 2.34436800  | -0.80725300 |
| O | -10.47534000 | 0.56530300  | 0.50398400  |
| C | -11.89006500 | 0.41012400  | 0.69855500  |
| H | -12.37214900 | 0.23832400  | -0.26804800 |
| H | -12.29536200 | 1.31887800  | 1.15261700  |
| C | -12.05785100 | -0.78279100 | 1.61741400  |
| H | -11.63540100 | -1.68033200 | 1.14964900  |
| H | -11.53873100 | -0.60014800 | 2.56612200  |
| O | -13.45574500 | -0.93252900 | 1.82749200  |
| C | 8.80345800   | 2.87816800  | 2.85826100  |
| H | 9.47876100   | 3.62001100  | 3.32482000  |
| H | 9.38347400   | 2.41662700  | 2.03378100  |
| C | 7.63766300   | 3.63666200  | 2.23113100  |
| H | 7.10213700   | 4.20065500  | 3.00754600  |
| H | 6.93371200   | 2.92228300  | 1.78126700  |
| O | 8.14679200   | 4.52449300  | 1.23309600  |
| H | 7.41144600   | 5.00987700  | 0.84406600  |
| O | 8.36380100   | 1.92863400  | 3.78109500  |
| H | 8.11239800   | 0.72117000  | 3.08767600  |

[BHET]<sub>2</sub>

|   |             |             |             |
|---|-------------|-------------|-------------|
| C | -5.77785600 | 0.05422800  | -0.00919600 |
| C | -4.40326400 | -0.13910500 | -0.02500000 |
| C | -3.88309300 | -1.43605900 | -0.03982400 |
| C | -4.74179100 | -2.53781300 | -0.04030000 |

|   |              |             |             |
|---|--------------|-------------|-------------|
| C | -6.11504400  | -2.34439900 | -0.02468100 |
| C | -6.63607900  | -1.04849900 | -0.00834200 |
| H | -6.17804200  | 1.06168000  | 0.00347100  |
| H | -3.74058800  | 0.71893200  | -0.02472000 |
| H | -4.33351200  | -3.54280000 | -0.05225700 |
| H | -6.78529800  | -3.19744600 | -0.02435600 |
| C | -2.41567600  | -1.68590600 | -0.05270000 |
| O | -1.91021700  | -2.79652900 | -0.05929700 |
| O | -1.69741800  | -0.56458100 | -0.05505400 |
| C | -0.27089300  | -0.70707700 | -0.06056000 |
| H | 0.03949000   | -1.25224700 | -0.95596100 |
| H | 0.04556200   | -1.25362900 | 0.83192600  |
| C | 0.27092600   | 0.70717100  | -0.06073700 |
| H | -0.04554300  | 1.25394600  | 0.83160800  |
| H | -0.03945400  | 1.25210700  | -0.95628300 |
| O | 1.69744800   | 0.56468200  | -0.05520400 |
| C | -8.11624000  | -0.88319700 | 0.01365700  |
| O | -8.90621300  | -1.81400100 | 0.02178300  |
| O | -8.49709600  | 0.39049000  | 0.02601300  |
| C | -9.90921900  | 0.65189000  | 0.05945100  |
| H | -10.33958400 | 0.20205100  | 0.95872800  |
| H | -10.37960900 | 0.21766900  | -0.82731500 |
| C | -10.05340600 | 2.15996100  | 0.07739000  |
| H | -9.54655400  | 2.57382300  | 0.95753700  |
| H | -9.60410300  | 2.59126800  | -0.82537400 |
| O | -11.44870200 | 2.42953200  | 0.12562600  |
| H | -11.57876400 | 3.38780700  | 0.14969000  |
| C | 4.40326000   | 0.13917200  | -0.02470800 |
| C | 5.77784300   | -0.05419800 | -0.00869400 |
| C | 6.63609600   | 1.04850200  | -0.00809700 |
| C | 6.11510200   | 2.34441600  | -0.02492200 |



|   |             |             |             |
|---|-------------|-------------|-------------|
| C | 4.74185500  | 2.53786900  | -0.04073600 |
| C | 3.88312700  | 1.43613600  | -0.03998600 |
| H | 3.74054700  | -0.71883600 | -0.02422900 |
| H | 6.17799800  | -1.06165900 | 0.00432100  |
| H | 6.78538800  | 3.19743700  | -0.02484800 |
| H | 4.33361000  | 3.54286400  | -0.05308100 |
| C | 8.11624800  | 0.88315800  | 0.01417200  |
| O | 8.90625500  | 1.81392500  | 0.02270300  |
| O | 8.49704700  | -0.39054600 | 0.02627400  |
| C | 9.90917300  | -0.65199600 | 0.05953000  |
| H | 10.33955100 | -0.20265400 | 0.95906100  |
| H | 10.37956500 | -0.21730100 | -0.82699200 |
| C | 10.05332100 | -2.16007600 | 0.07674600  |
| H | 9.54626900  | -2.57432600 | 0.95659900  |
| H | 9.60420900  | -2.59096700 | -0.82630800 |
| O | 11.44859700 | -2.42969800 | 0.12513600  |
| H | 11.57858400 | -3.38798900 | 0.14895900  |
| C | 2.41571300  | 1.68600300  | -0.05307400 |
| O | 1.91025700  | 2.79662400  | -0.06004200 |

[BHET]-

|   |             |             |             |
|---|-------------|-------------|-------------|
| C | 0.73910500  | -0.37874000 | 0.00019400  |
| C | -0.64941100 | -0.36816300 | 0.00008200  |
| C | -1.33646900 | 0.84888800  | -0.00013700 |
| C | -0.62951700 | 2.05371400  | -0.00023500 |
| C | 0.75726900  | 2.04239500  | -0.00008700 |
| C | 1.44553500  | 0.82692800  | 0.00012000  |
| H | 1.26926600  | -1.32448300 | 0.00036100  |
| H | -1.19365600 | -1.30588500 | 0.00015800  |
| H | -1.16625700 | 2.99645500  | -0.00041300 |
| H | 1.30909500  | 2.97635600  | -0.00015400 |

|   |             |             |             |
|---|-------------|-------------|-------------|
| C | -2.82420900 | 0.90548500  | -0.00027000 |
| O | -3.46709800 | 1.94363000  | -0.00057500 |
| O | -3.39284300 | -0.29686200 | -0.00005400 |
| C | -4.82887200 | -0.34004600 | -0.00005800 |
| H | -5.20666700 | 0.16533700  | -0.89344800 |
| H | -5.20668900 | 0.16573700  | 0.89309400  |
| C | -5.20435300 | -1.80779800 | 0.00026600  |
| H | -4.79778100 | -2.29972600 | -0.89163100 |
| H | -4.79782200 | -2.29932800 | 0.89240000  |
| O | -6.62551300 | -1.85625000 | 0.00024300  |
| H | -6.90214200 | -2.78283200 | 0.00050300  |
| C | 2.93699000  | 0.85805000  | 0.00032100  |
| O | 3.58820000  | 1.89361100  | 0.00084900  |
| O | 3.48563900  | -0.34680800 | -0.00009600 |
| C | 4.93291500  | -0.42765700 | 0.00009800  |
| H | 5.31023100  | 0.08025700  | 0.89345000  |
| H | 5.31054600  | 0.08111000  | -0.89262900 |
| C | 5.32669100  | -1.90220700 | -0.00055600 |
| H | 4.84831100  | -2.37247800 | 0.88409600  |
| H | 4.84890000  | -2.37154700 | -0.88602200 |
| O | 6.70919400  | -2.03408000 | -0.00014100 |

[BHET]

|   |             |             |             |
|---|-------------|-------------|-------------|
| C | 0.69422100  | -0.35753300 | 0.00051200  |
| C | -0.69422700 | -0.35753200 | 0.00051300  |
| C | -1.39035600 | 0.85424000  | 0.00009200  |
| C | -0.69337400 | 2.06480300  | -0.00030500 |
| C | 0.69337500  | 2.06480300  | -0.00030500 |
| C | 1.39035300  | 0.85423800  | 0.00009300  |
| H | 1.23141100  | -1.29927300 | 0.00085100  |
| H | -1.23141800 | -1.29927200 | 0.00086100  |

|   |             |             |             |
|---|-------------|-------------|-------------|
| H | -1.23789400 | 3.00301900  | -0.00062700 |
| H | 1.23789700  | 3.00301800  | -0.00062800 |
| C | -2.87897600 | 0.89915900  | 0.00006500  |
| O | -3.52918500 | 1.93245700  | 0.00014800  |
| O | -3.43781900 | -0.30753700 | -0.00010500 |
| C | -4.87365700 | -0.36183600 | -0.00004500 |
| H | -5.25517700 | 0.14107000  | -0.89322600 |
| H | -5.25507800 | 0.14084800  | 0.89330000  |
| C | -5.23845000 | -1.83230000 | -0.00021600 |
| H | -4.82853700 | -2.32104200 | -0.89235500 |
| H | -4.82841000 | -2.32128400 | 0.89173000  |
| O | -6.65918300 | -1.89039200 | -0.00010600 |
| H | -6.92989400 | -2.81871300 | -0.00005500 |
| C | 2.87897300  | 0.89915000  | 0.00005800  |
| O | 3.52919000  | 1.93244100  | 0.00001500  |
| O | 3.43781500  | -0.30754800 | 0.00007700  |
| C | 4.87365300  | -0.36183500 | 0.00005900  |
| H | 5.25512800  | 0.14084100  | 0.89338800  |
| H | 5.25510700  | 0.14108200  | -0.89314000 |
| C | 5.23845600  | -1.83229500 | -0.00013700 |
| H | 4.82855700  | -2.32125700 | 0.89188400  |
| H | 4.82841100  | -2.32106300 | -0.89220000 |
| O | 6.65918900  | -1.89037800 | -0.00026900 |
| H | 6.92990300  | -2.81869800 | -0.00015700 |
